# Supplementary material for: Acquisition of an oncogenic fusion protein serves as an initial driving mutation by inducing aneuploidy and overriding proliferative defects
Source: PubMed Central journal article supplement (PMC5325330; doi:10.18632/oncotarget.11716), 2016-08-30

# Acquisition of an oncogenic fusion protein serves as an initial driving mutation by inducing aneuploidy and overriding proliferative defects

## Supplementary Material

Supplementary Figure 1

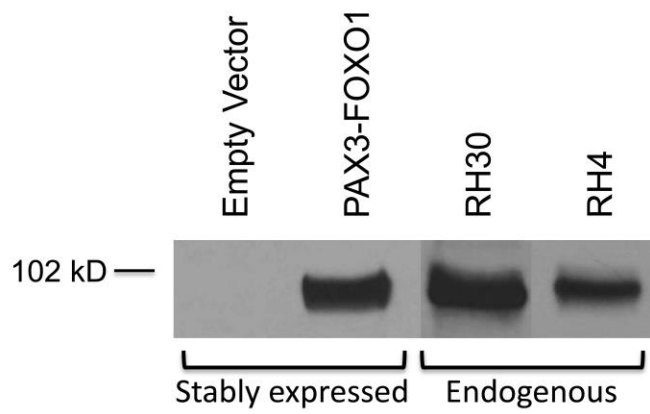

Supplement: oncotarget-07-62814-s001.pdf [file oncotarget-07-62814-s001.pdf]
